# Supplementary material for: Substitution of Percutaneous Ethanol Injection with a Low Molecular Weight Peptide Gel Mimicking Chemoembolization for Cancer Therapy
Source: PubMed Central journal article supplement — Nanotheranostics. 2017 Jul 6;1(3):313–25. doi: 10.7150/ntno.20468 (PMC5646736; doi:10.7150/ntno.20468), 2017-07-06
Supplement: ntnov01p0313s1.pdf [file ntnov01p0313s1.pdf]

## Supporting Information

### Substitution of percutaneous ethanol injection with a low molecular weight peptide gel mimicking chemoembolization for cancer therapy

Long Xu<sup>a§</sup>, Yan Liang<sup>a§</sup>, Changzheng Sun<sup>a</sup>, Na Hao<sup>a</sup>, Jianqin Yan<sup>a</sup>, Wenxia Gao<sup>b\*</sup>, Bin He<sup>a\*</sup>

<sup>a</sup> National Engineering Research Center for Biomaterials, Sichuan University, Chengdu 610064, China

<sup>b</sup> College of Chemistry and Materials Engineering, Wenzhou University, Wenzhou 325027, China

§These authors contributed equally in this work

\*To whom correspondence should be addressed, E-mail: [wenxiag@wzu.edu.cn](mailto:wenxiag@wzu.edu.cn) (W. Gao);

[bhe@scu.edu.cn](mailto:bhe@scu.edu.cn) (B. He)

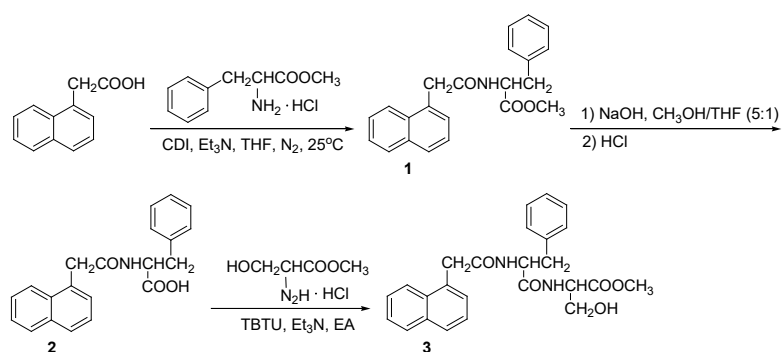

<sup>1</sup>HNMR and HRMS spectra of the synthesized compounds

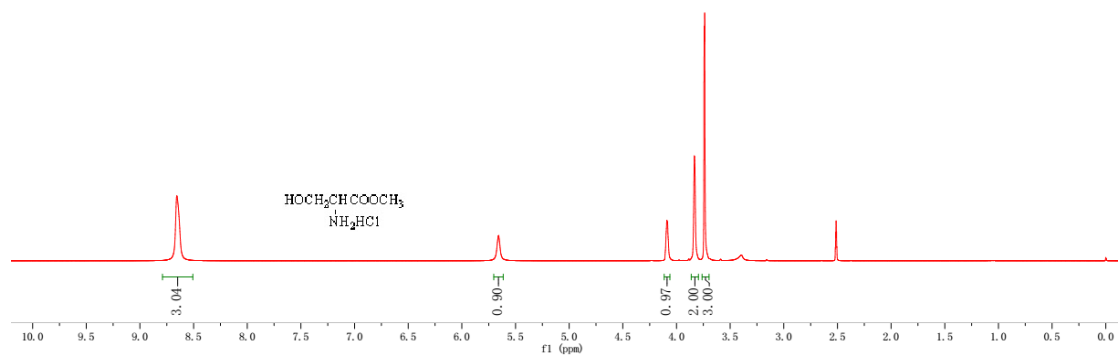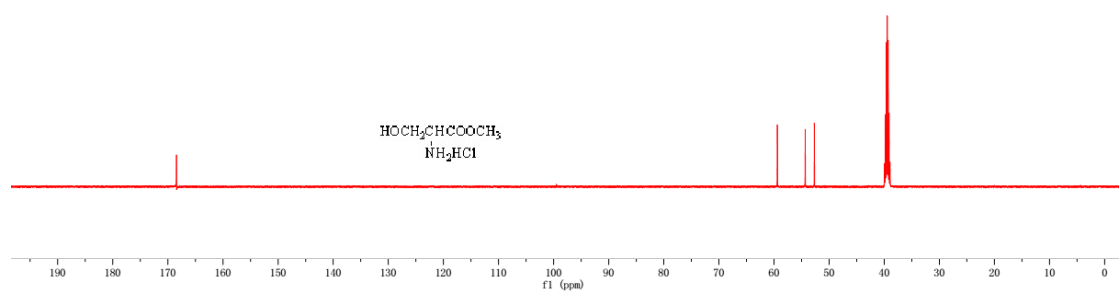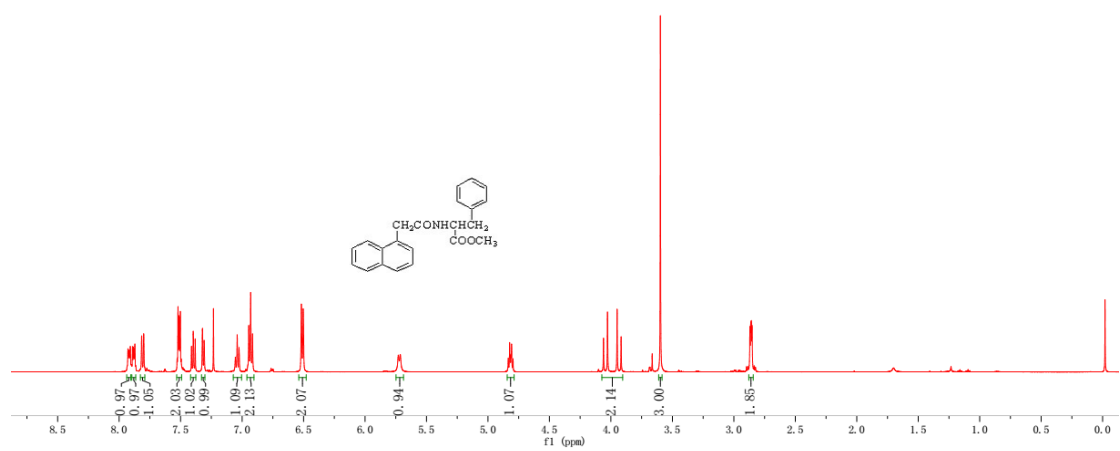

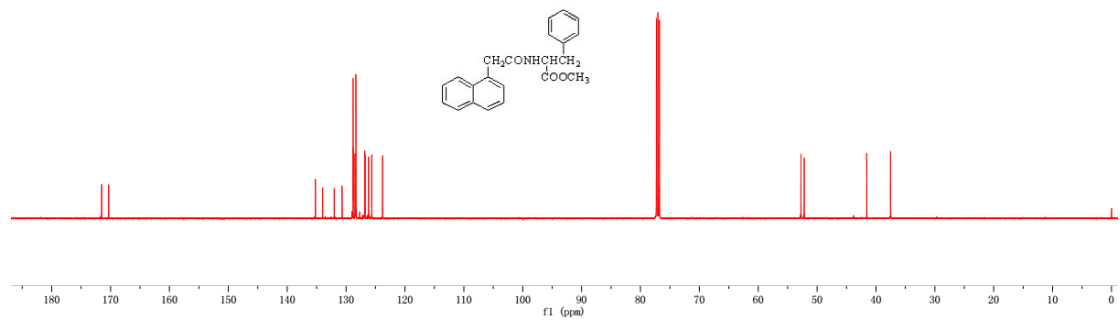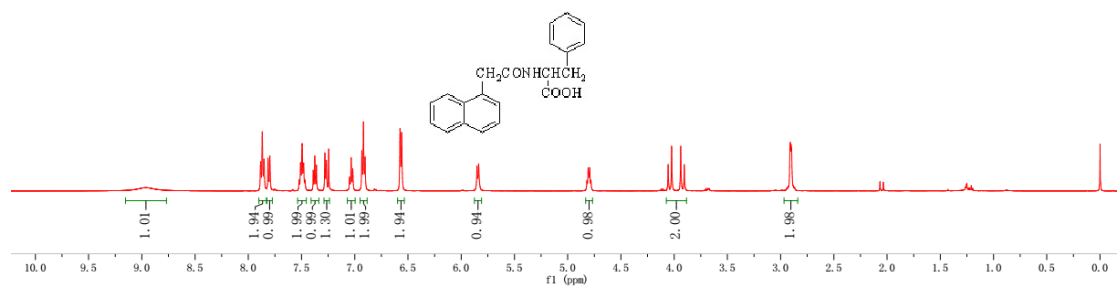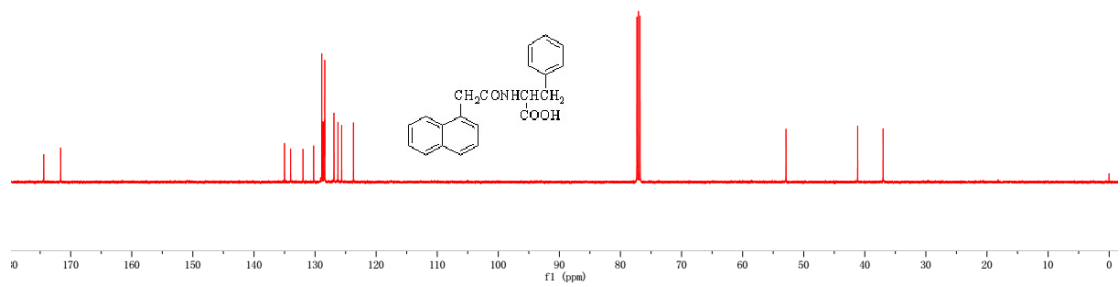

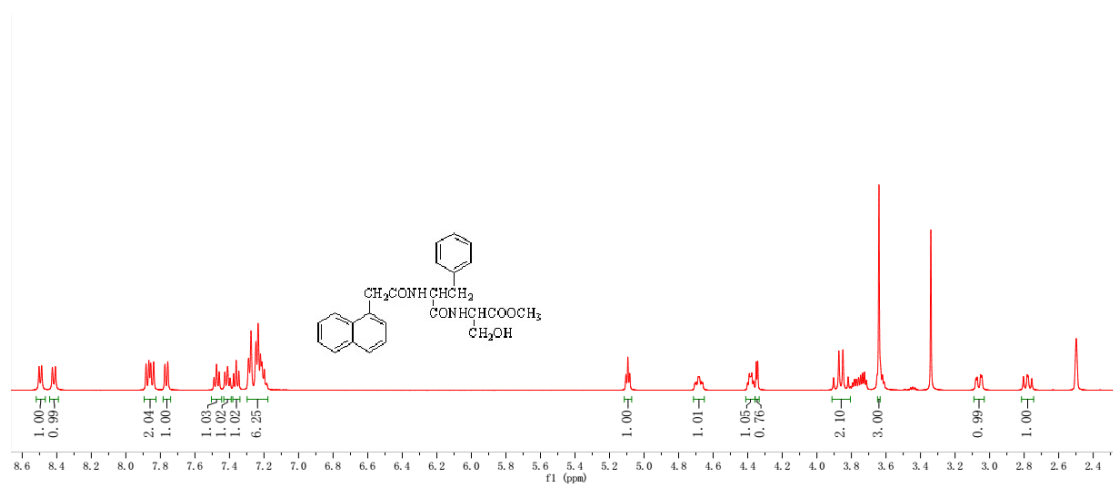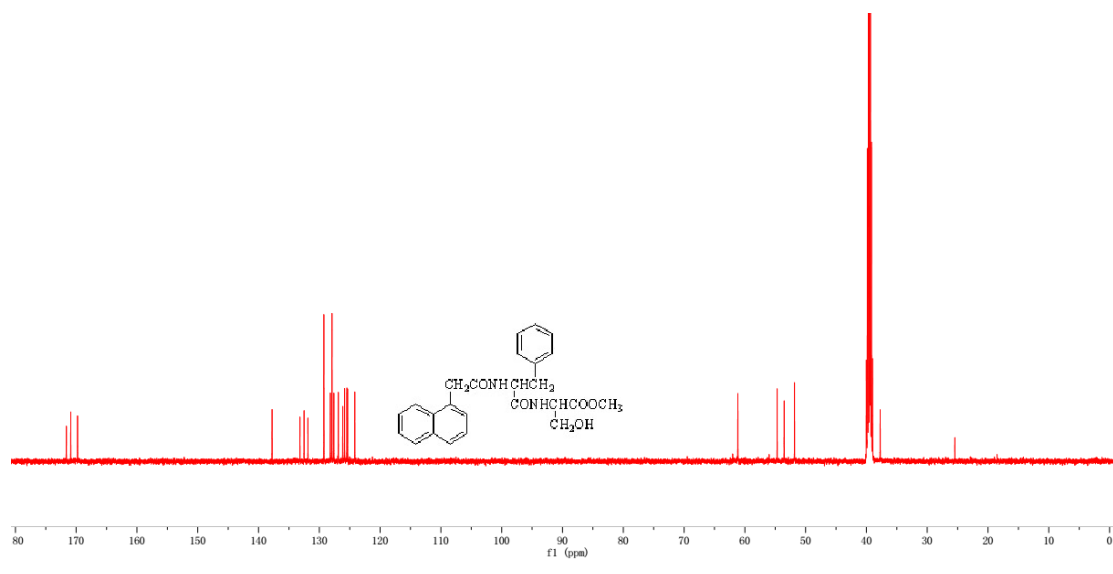

# Generic Display Report

## Analysis Info

Analysis Name D:\Data\hbl\xl042401.d  
Method tune\_150-800.m  
Sample Name xl042401  
Comment

Acquisition Date 4/24/2014 2:54:11 PM

Operator BDAL@DE  
Instrument micrOTOF-Q II

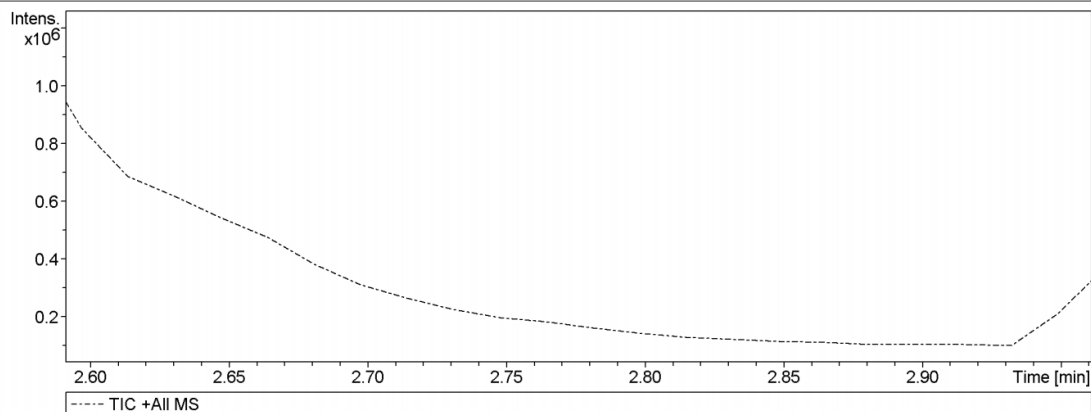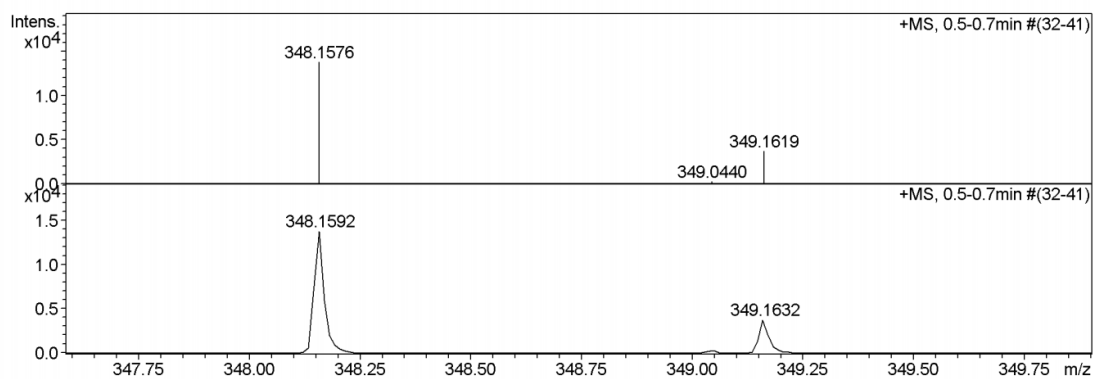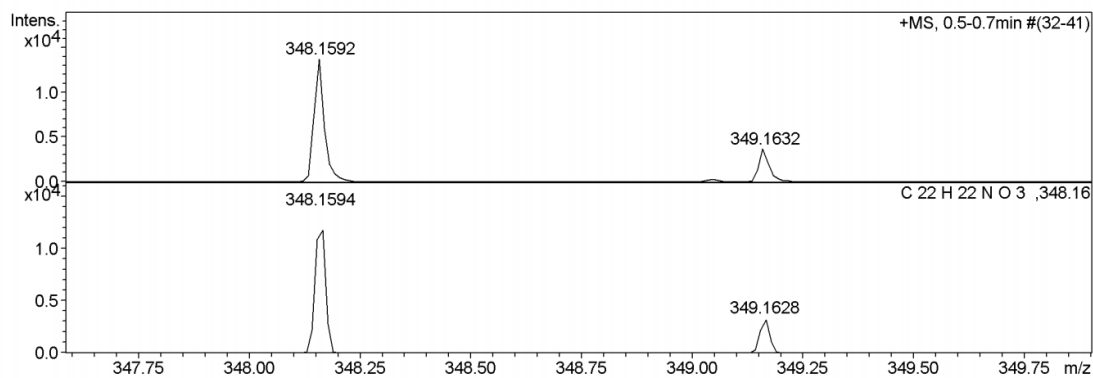

Compound 1:

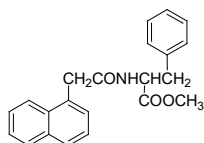

# Generic Display Report

## Analysis Info

Analysis Name D:\Data\hbl\l042401.d  
Method tune\_150-800.m  
Sample Name x1042401  
Comment

Acquisition Date 4/24/2014 2:54:11 PM

Operator BDAL@DE  
Instrument micrOTOF-Q II

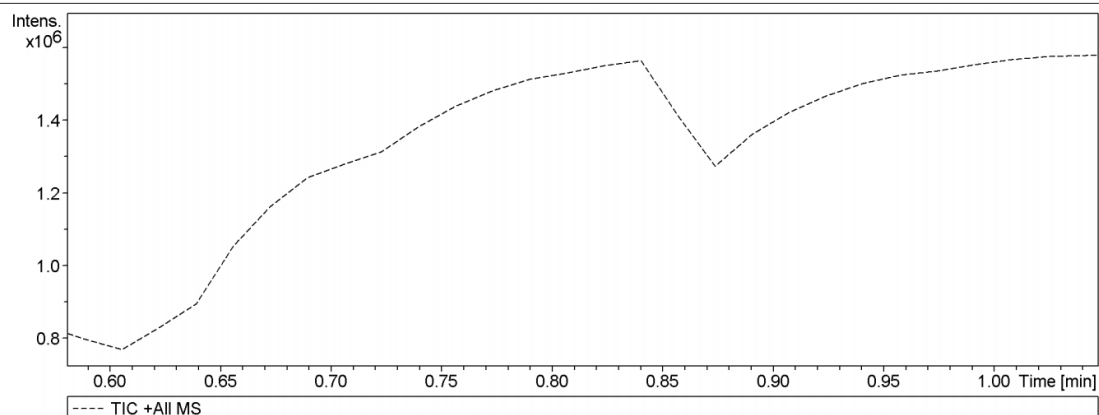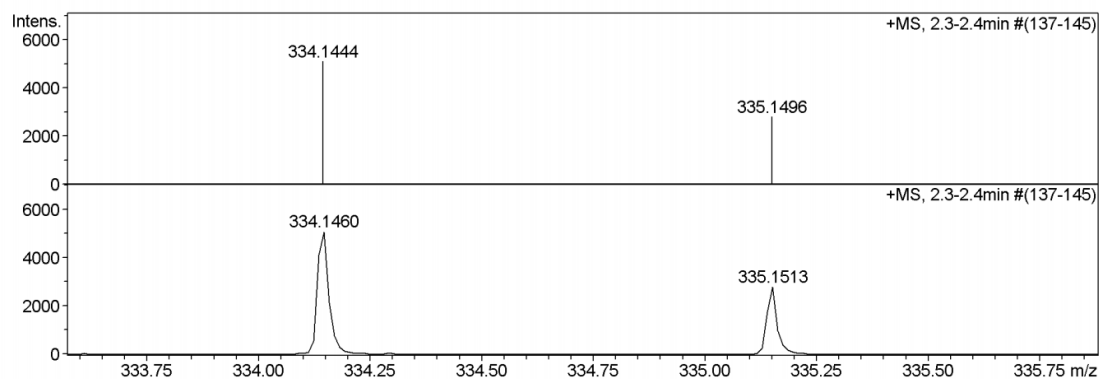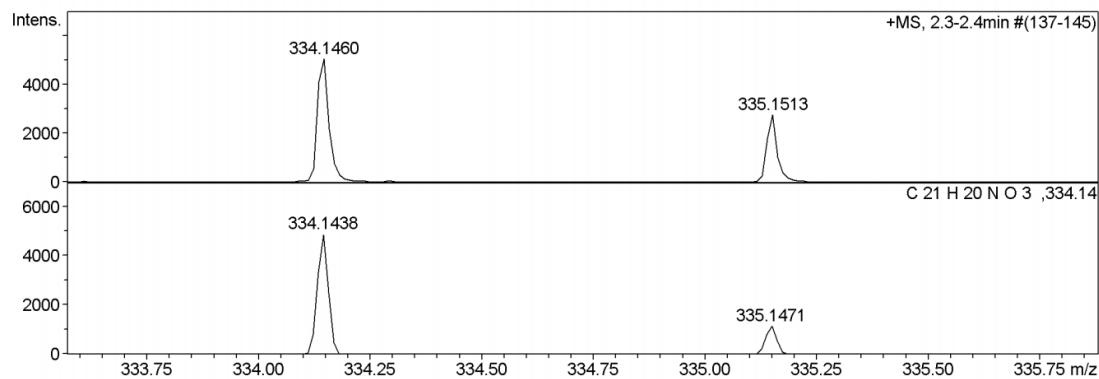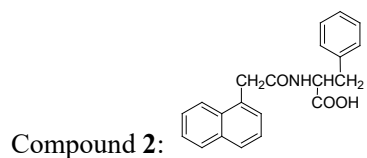

# Generic Display Report

## Analysis Info

Analysis Name D:\Data\hbl\l042405.d  
Method tune\_150-800.m  
Sample Name l042405  
Comment

Acquisition Date 4/25/2014 3:05:49 PM

Operator BDAL@DE  
Instrument micrOTOF-Q II

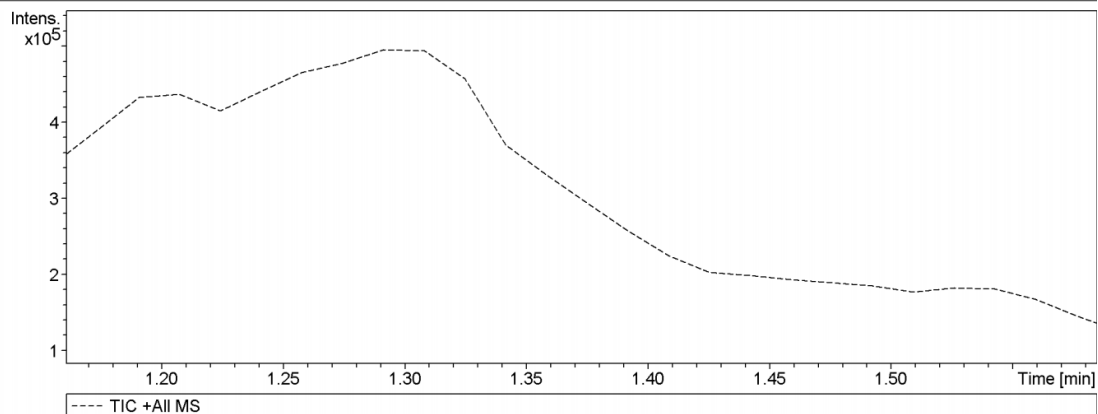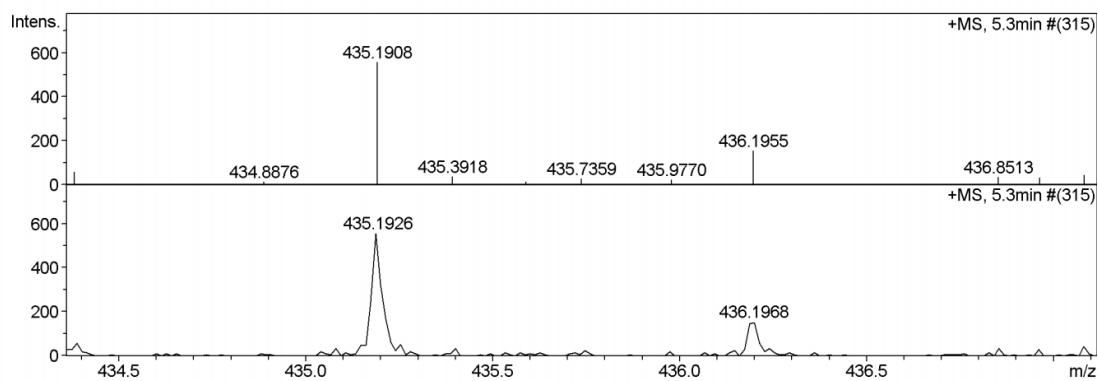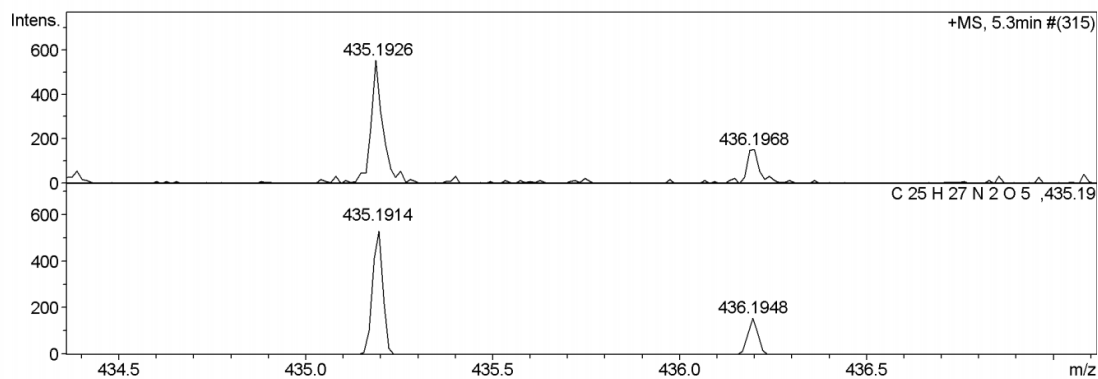

Compound 3:

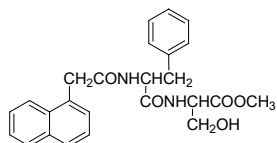

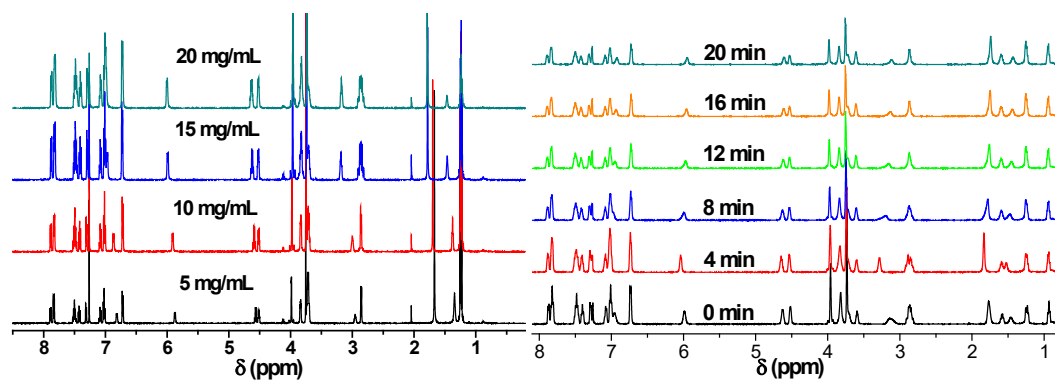

Figure S2. The  $^1\text{H}$  NMR spectra of the sol-gel transition with different concentrations (A) and gelation time (B).

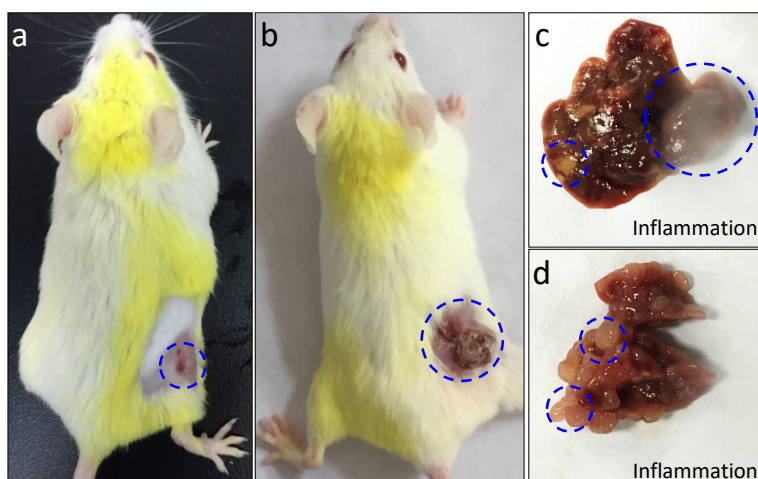

Figure S3. Photos of tumor-bearing BALB/c male mice treated with DOX-loaded gel (a) and saline (b) at 21 day, the inflammation in liver (c) and spleen (d) in tumor-bearing BALB/c male mice treated with saline at 21 day.
